# Supplementary material
Source: PubMed Central journal article supplement (PMC2574811)
Supplement: NIHMS65715-supplement-1.pdf [file NIHMS65715-supplement-1.pdf]

## Supplemented Data

Table 1S. Effect of doxorubicin and cisplatin on proliferation and cytokine/growth factor production by human H460 NSCLC line

| Exp # | Groups    | No. cells/well (x 10 <sup>3</sup> ) | Cytokines (pg/ml) |            |         |       |       |        |
|-------|-----------|-------------------------------------|-------------------|------------|---------|-------|-------|--------|
|       |           |                                     | IL-6              | IL-8       | VEGF    | bFGF  | G-CSF | RANTES |
| A1    | Control   | 1,000±212                           | 2,559±287         | 3,747±435  | 298±32  | 12±2  | 0     | 0      |
|       | Doxo      | 90±23*                              | 5,263±456*        | 4,252±346* | 185±23* | 23±3* | 23±1* | 12±1*  |
|       | Cispl     | 100±31*                             | 10,653±1,129*     | 5,398±439* | 335±39  | 37±5* | 55±4* | 46±5*  |
| A2    | Control   | 47±8                                | 1,403±98          | 3,607±397  | 150±23  | 8±2   | 0     | 0      |
|       | PostDoxo  | 9 ±1*                               | 6,196±589*        | 4,676±563* | 143±19  | 12±2  | 28±4* | 5±1    |
|       | PostCispl | 20±3*                               | 12,112±1,774*     | 5,759±321* | 353±32* | 28±3* | 6±1   | 8±1    |

Experiment A1: H460 tumor cells were seeded onto a 24-well plate (2x10<sup>5</sup>/well/2ml), with 8 wells per group. Cells were cultured for 3 days in the presence of doxorubicin (0.125 µg/ml) or cisplatin (0.3 µg/ml). Supernatants were collected and cells were counted.

Data is presented as mean concentration of cytokines ± SD

Experiment A2: Cells collected from the control and drug-treated groups (experiment A1) were seeded into a 96-well plate (1x10<sup>4</sup> cells/well) in fresh RPMI-1640 media without any drug. Cells were cultured for 3 days, supernatants were collected and the number of cells was estimated using the One Solution Cell Proliferation Kit (Promega). The concentrations of TPFs in the harvested supernatants were analyzed using a multiplex immunobeads kit. Data is presented as mean pg/ml ± SD

\* Differences between control and experimental groups were significant (p<0.05).
